# Supplementary material for: Crystal structure of a blue laccase from Lentinus tigrinus: evidences for intermediates in the molecular oxygen reductive splitting by multicopper oxidases
Source: PubMed Central journal article supplement (PMC2064922; doi:10.1186/1472-6807-7-60), 2007-09-26
Supplement: 1472-6807-7-60-S1.pdf [file 1472-6807-7-60-S1.pdf]

## Supplementary Material 1

**Table 3**

Occupation and Temperature B factors for the atoms composing the trinuclear copper cluster moiety for both molecules A and B

| <i>Atom</i>       | <i>Occupancy</i> | <i>B Factors (Å<sup>2</sup>)</i> |
|-------------------|------------------|----------------------------------|
| <b>Molecule A</b> |                  |                                  |
| Cu1A              | 0.75             | 19.18                            |
| Cu2A              | 0.5              | 19.78                            |
| Cu3(a)A           | 0.75             | 22.30                            |
| Cu3(b)A           | 0.75             | 21.25                            |
| OH O1             | 0.75             | 21.79                            |
| Oxo O2            | 0.5              | 26.72                            |
| <b>Molecule B</b> |                  |                                  |
| Cu1B              | 0.75             | 24.22                            |
| Cu2B              | 0.5              | 23.87                            |
| Cu3(a)B           | 0.75             | 26.90                            |
| Cu3(b)B           | 0.75             | 24.14                            |
| Per O1            | 0.75             | 33.73                            |
| Per O2            | 0.75             | 23.57                            |
|                   |                  |                                  |
