# Supplementary material for: Crystal structure of a blue laccase from Lentinus tigrinus: evidences for intermediates in the molecular oxygen reductive splitting by multicopper oxidases
Source: PubMed Central journal article supplement (PMC2064922; doi:10.1186/1472-6807-7-60), 2007-09-26
Supplement: 1472-6807-7-60-S2.pdf [file 1472-6807-7-60-S2.pdf]

## Supplementary Material 2

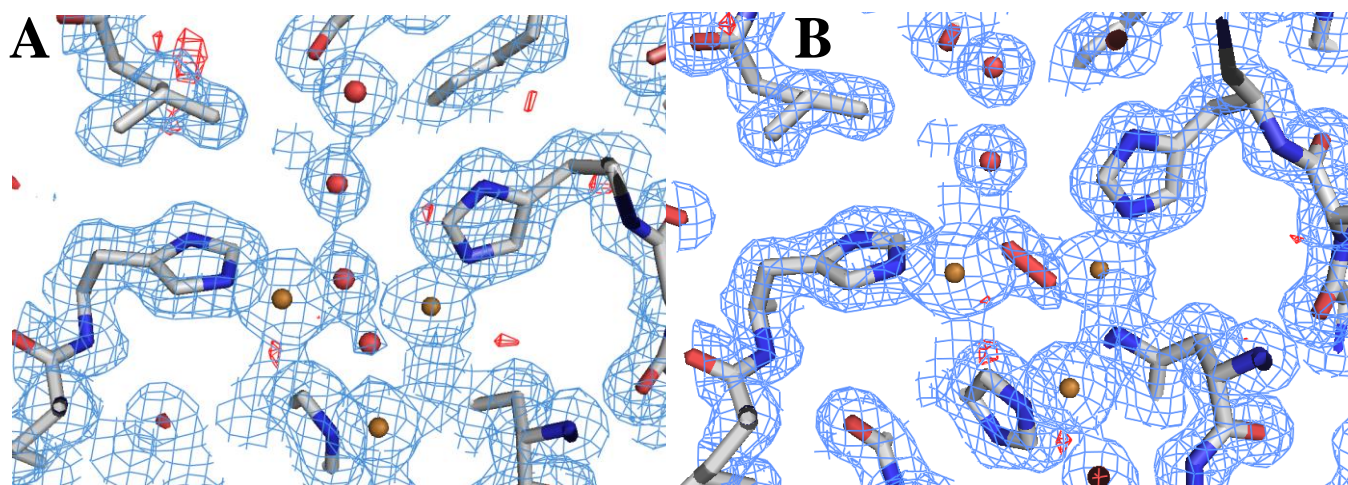

Figure 6 - (A) and (B) Representations of the 2Fo-Fc difference Fourier map (cyan colored, the electron density is contoured at  $3\sigma$ ) with a superposed Fo-Fc difference Fourier map (red colored, The electron density is contoured at  $3\sigma$ ), for the T2/T3 active site of molecules A and B of *LtL* respectively.
